# Supplementary material for: Re-Examining the Industry Experience–Venture Survival Relationship
Source: Atypon-hosted journal article supplement (doi:10.1287/stsc.2022.0033), 2023-07-19
Supplement: stsc.2022.0033.sm1.pdf [file stsc.2022.0033.sm1.pdf]

**RE-EXAMINING THE INDUSTRY-EXPERIENCE VENTURE-SURVIVAL  
RELATIONSHIP**

**APPENDIX A**

**TABLE A1 – List of 19 sectors**

Agriculture, forestry, and fishing

Mining and quarrying

Manufacturing

Electricity, gas, steam, and air conditioning supply

Water supply, sewerage, and waste management

Construction

Wholesale and retail trade

Transportation

Accommodation and food service activities

Information and communication

Financial and insurance

Real estate activities

Knowledge-based services

Travel agent, cleaning, and other operational services

Public administration, defense, and compulsory social security

Education

Human health and social work

Arts, entertainment, and recreation activities

Other service activities

**TABLE A2 – List of industries that fall into the KBS sector**

Legal activities

Accounting, bookkeeping, and auditing activities; tax consultancy

Activities of non-financial head offices

Activities of financial head offices

Public relation and communication activities

Business and other management consultancy activities

Architectural activities

Consulting engineering activities within construction

Consulting engineering activities within production and machinery technique

Mounting and delivery of ready-made production plants

Geologic surveying activities and prospecting, chartered surveyors, etc.

Other technical consultancy

Testing and control activities in the field of food hygiene

Technical testing and control

Other measuring and technical analysis

Research and experimental development on biotechnology

Other research and experimental development on natural sciences and engineering

Research and experimental development on social sciences and humanities

Advertising agencies

Other advertising activities

Media representation

Market research and public opinion polling

Industrial design and product design

Communications design and graphic design

Activities of interior decorators and room design

Photographic activities

Translation and interpretation activities

Agronomy consulting

Other professional, scientific, and technical activities n.e.c.

Veterinary activities

## **APPENDIX B: DESCRIPTION OF THE RELATEDNESS MEASURES**

In the main analysis, we operationalize industry relatedness based on the Euclidean Distance of occupation codes between any two industries. This operationalization has several advantages that we point out in the article. However, it is only one of many possible operationalizations and it may not be perfect. Already Neffke and Henning (2013, p. 298) pointed out that “the definition of relatedness, and the methods for measuring relatedness are often surprisingly imprecise.” We construct two alternative measures of industry relatedness—using sector definitions and labor flows—to reduce potential concerns regarding the measure used in the main analysis and to verify our findings.

One concern may be that the detailedness of the occupation codes used for calculating the Euclidean Distance cause some industries to be more related than others simply because the name of some occupations may differ across industries while others are universal (e.g., electrical engineer versus general office work). Therefore, any two industries that employ many employees in occupations that are more universal will be more related—even though the employees may have different knowledge and tasks. Although this is in line with the assumption that general skills are more transferable across industries than more specific skills, it may affect the conclusions drawn from the analysis. To address this concern, we define an alternative measure of industry relatedness based on the industry classifications’ sector definitions.

While we find differences in terms of which industries are considered related compared to industry aggregation at the sector level, the percentage of employees from a related industry is similar. The results are presented in Appendix Table B1 using sector-based relatedness for comparison. The conclusions drawn from those results are consistent with the findings presented here.

However, the accuracy of the hierarchy of the industry classifications has been questioned in terms of its ability to capture industry-relatedness. As Bryce and Winter (2009, p. 1572) write:

*the fact that two four-digit industries share the same three-digit code (and on up the line) supplies no clear message about strategically significant relationships among activities. Relatedness simply cannot be reliably or directly inferred from the hierarchical structure of the SIC system (cf. Davis and Duhaime 1992, Robins and Wiersema 1995).*

Therefore, we prefer the operationalization of industry-relatedness based on the Euclidean Distance of occupation classifications between industries.

**\*\* Table B1 about here \*\***

Besides sector-level relatedness, another industry relatedness measure builds on the idea that employees move to jobs that require similar skills (but which may be classified differently). Initially used to predict firm diversification (Neffke et al., 2011; Neffke & Henning, 2013), any two industries are considered to be related the higher the cross-industry labor flows between these two industries. Since we focus predominantly on employee mobility across and within industries (which defines the relatedness of industries), we consider this operationalization less appropriate for our purposes. However, for completeness and comparability, we calculate industry relatedness based on employee flows using data on the entire working population in Denmark (see Appendix C). Construction of the flow measure follows Neffke and Henning (2013, and subsequent work). Tabulation of the origin of employees broken down into occupation categories similar to Table 3 is provided in Appendix Table B2.

**\*\* Table B2 about here \*\***

As expected, the number of employees from related industries is higher using the flow measure compared to either of the other two relatedness measures. The percentage of new ventures with related (but not the same) industry experience follows similar patterns across measures (see Tables B3 and B4 for a comparison of the Euclidean Distance, sector, and flow measures). Notably, the sector-based measure has the lowest numbers of related (but not the same) industry experience across new establishments. The overall conclusions based on these results using the labor-flow measure are consistent with the results section.

\*\* Table B3 and B4 about here \*\*

Table B5 shows models replicating Model 3 in Table 4 using the two other relatedness measures. To ease comparability, Model 1 shows the results using the ED measure as presented in Table 4. Using the flow measure (Model 2) and the sector measure (Model 2) we find that having at least one focal employee with related industry experience does not affect new venture survival. The coefficient of having at least one focal employee with industry experience remains stable across models, although slightly increased in magnitude and significance in Model 2.

\*\* Table B5 about here \*\*

Table B6 confirms the findings that our results do not reflect a process where talent redeploys to a new industry (replicating Table 8). The rate of focal employees from a related industry leaving for employment in the same industry is slightly higher using the flow-based or sector-based measure (14% and 19%) than the ED measure (12%), while the rate of focal employees from an unrelated industry or from outside the workforce remaining in the same industry after leaving the new establishment is lower using either of these measures (7% and 9%) than the ED-measure (10%). The rate of employees leaving for employment in the same sector (but not the same industry) is considerably lower than when using the ED or flow measure (17%

vs 41% and 51%, respectively). Using the sector measure, most employees leave for employment in a different sector (68%). These rates are lower using the ED measure (44%) or flow measure (33%). Although we observe differences, the conclusions drawn do not change.

**\*\* Table B6 about here \*\***

**TABLE B1 – Origin of employees in new ventures using sector-relatedness**

| Worker type            | From same industry | From different industry—<br>but same sector | From different sector | From other | Total |
|------------------------|--------------------|---------------------------------------------|-----------------------|------------|-------|
| High-knowledge         | 13.07%             | 23.71%                                      | 51.67%                | 11.55%     | 100%  |
| Intermediate-knowledge | 11.18%             | 16.77%                                      | 61.49%                | 10.56%     | 100%  |
| Manager                | 14.29%             | 22.08%                                      | 55.84%                | 7.79%      | 100%  |
| Other                  | 9.28%              | 9.47%                                       | 48.24%                | 33.00%     | 100%  |

*n = 2161 (employees) in 309 new ventures*

**TABLE B2 - Origin of employees in new ventures using labor-flow relatedness**

| Worker type            | From same industry | From related industry | From unrelated industry | From other | Total |
|------------------------|--------------------|-----------------------|-------------------------|------------|-------|
| High-knowledge         | 13.07%             | 48.63%                | 26.75%                  | 11.55%     | 100%  |
| Intermediate-knowledge | 11.32%             | 45.28%                | 32.70%                  | 10.69%     | 100%  |
| Manager                | 14.47%             | 59.21%                | 18.42%                  | 7.89%      | 100%  |
| Other                  | 13.07%             | 48.63%                | 26.75%                  | 11.55%     | 100%  |

*n = 2140 (employees) in 309 new ventures (21 observations are excluded as no relatedness measure was calculated for the respective industry combinations)*

**Table B3 – New venture related experience**

| Related (but not same) industry experience                                                                              | ED-measure | Sector measure | Labor flow measure |
|-------------------------------------------------------------------------------------------------------------------------|------------|----------------|--------------------|
| At least one high-knowledge worker with related industry experience                                                     | 22.33%     | 14.89%         | 26.86%             |
| At least one intermediate-knowledge worker with related industry experience                                             | 11.00%     | 6.80%          | 16.83%             |
| At least one manager with related industry experience                                                                   | 8.41%      | 4.53%          | 10.36%             |
| At least one focal employee (i.e., high-knowledge, intermediate knowledge, or manager) with related industry experience | 29.45%     | 21.36%         | 39.48%             |
| At least one other employee with related industry experience                                                            | 32.69%     | 21.04%         | 44.34%             |
| At least one employee with related industry experience                                                                  | 58.90%     | 29.77%         | 51.78%             |

*n = 309 new ventures*

**Table B4 – New subsidiary related experience**

| Related industry experience (but not same industry)                                                                     | ED-measure | Sector measure | Labor flow measure |
|-------------------------------------------------------------------------------------------------------------------------|------------|----------------|--------------------|
| At least one high-knowledge worker with related industry experience                                                     | 18.26%     | 10.67%         | 19.94%             |
| At least one intermediate-knowledge worker with related industry experience                                             | 10.11%     | 4.78%          | 12.64%             |
| At least one manager with related industry experience                                                                   | 4.49%      | 1.69%          | 6.18%              |
| At least one focal employee (i.e., high-knowledge, intermediate knowledge, or manager) with related industry experience | 33.43%     | 13.20%         | 26.97%             |
| At least one other employee with related industry experience                                                            | 27.25%     | 14.04%         | 36.24%             |
| At least one employee with related industry experience                                                                  | 54.21%     | 22.19%         | 39.61%             |

*n = 356 new subsidiaries*

**Table B5 – Related industry experience and industry survival**

|                                                                                          | Model 1  | Model 2  | Model 3  |
|------------------------------------------------------------------------------------------|----------|----------|----------|
| At least one focal employee with IE                                                      | 0.186*   | 0.208**  | 0.182*   |
|                                                                                          | [2.49]   | [2.70]   | [2.50]   |
| At least one focal employee with related IE (but none from same industry) - ED measure   | 0.072    | .        | .        |
|                                                                                          | [1.14]   | .        | .        |
| At least one focal employee with related IE (but none from same industry) - FLOW measure | .        | 0.101+   | .        |
|                                                                                          | .        | [1.67]   | .        |
| At least one focal employee from same sector (but none from same industry)               | .        | .        | 0.087    |
|                                                                                          | .        | .        | [1.30]   |
| Nr. employees (ln)                                                                       | -0.099   | -0.109   | -0.103   |
|                                                                                          | [-1.45]  | [-1.62]  | [-1.52]  |
| Rural area                                                                               | 0.011    | 0.012    | 0.005    |
|                                                                                          | [0.18]   | [0.20]   | [0.09]   |
| Establishment year controls                                                              | YES      | YES      | YES      |
| Constant                                                                                 | 0.652*** | 0.650*** | 0.664*** |
|                                                                                          | [3.80]   | [3.80]   | [3.92]   |
| R-squared                                                                                | 0.087    | 0.092    | 0.088    |
| F                                                                                        | 3.819    | 4.267    | 3.946    |
| Log likelihood                                                                           | -203.205 | -202.42  | -203.05  |
| No. of observations                                                                      | 309      | 309      | 309      |
| <i>t</i> statistics in brackets                                                          | .        | .        | .        |
| + $p < 0.10$ , * $p < 0.05$ , ** $p < 0.01$ , *** $p < 0.001$                            | .        | .        | .        |

**Table B6: Origin and destinations of focal employees in new establishments****Panel A: Flow measure**

|                          | To same industry | To related industry | To unrelated industry and other | Total |
|--------------------------|------------------|---------------------|---------------------------------|-------|
| From the same            | 44.44%           | 39.51%              | 16.05%                          | 100%  |
| From related             | 13.57%           | 65.89%              | 20.54%                          | 100%  |
| From unrelated and other | 6.79%            | 38.91%              | 54.30%                          | 100%  |
|                          | 15.36%           | 51.43%              | 33.21%                          | 100%  |
| <i>N</i>                 | 560              |                     |                                 |       |

**Panel B: Sector measure**

|                          | To same industry | To same sector, but different industry | To different sector and other | Total |
|--------------------------|------------------|----------------------------------------|-------------------------------|-------|
| From the same            | 43.59%           | 11.54%                                 | 44.87%                        | 100%  |
| From related             | 19.00%           | 33.00%                                 | 48.00%                        | 100%  |
| From unrelated and other | 8.64%            | 14.14%                                 | 77.23%                        | 100%  |
|                          | 15.36%           | 17.14%                                 | 67.50%                        | 100%  |
| <i>N</i>                 | 560              |                                        |                               |       |

## **APPENDIX C – INDUSTRY RELATEDNESS MEASURE USING CROSS-INDUSTRY LABOR FLOWS**

To construct the industry relatedness measure, we follow Neffke and Henning (NF) (2013) and use flow of employees to measure relatedness between two industries. NF use register data provided by Statistics Sweden for the years 2004 to 2007; we use similar register data provided by Statistics Denmark for 2008 to 2016. The measure is based on the entire population and not just the study sample.

Specifically, our data include information on all employees in Denmark active in the labor market in a focal year. We excluded self-employment, employment as a spouse, secondary employment, and non-primary November employment, and individuals aged less than 17 years. We impose these restrictions because people that fall into the excluded categories may exhibit different mobility between jobs and industries compared to other employees. NF do not impose these restrictions however, they were inspired by NF's exclusions, as explained below. After imposing the restrictions, our data include information on 3,765,544 individuals working in more than 267,000 firms.

We use Denmark Statistic's DB07 industry classification (corresponding to the European NACE Rev. 2 classification) to calculate the number of employees in each industry-year. Following NF, we exclude industries with an average number of employees in the industry less than 250, which pertains to 144 industries. Our remaining sample of 449 industries is slightly larger than NF's (415 industries). Among these 449 industries, 445 are observed across all years in the period 2008-2016.<sup>1</sup>

---

<sup>1</sup> Initially, 145 industries did not satisfy the size criterion and 455 did satisfy it. Of the 455 industries with at least 250 employees per year on average 13 industries were not observed in every year. In addition, 17 industries that did not meet the size cut-off were not observed in every year in the period 2008 to 2016. Among these not

We identify all employees changing employer from one year to the next.<sup>2</sup> We exclude mobility events due to ownership changes (e.g., acquisitions) or employees moving out of the Danish labor market (e.g., to unemployment, (early) retirement, or abroad). On average, nearly 330,000 (328,468) employees per year (12.9%) change jobs. If we did not exclude mobility due to acquisitions, mergers, and other ownership changes, the number of employees changing jobs in a year would be around 1 percent higher (13.9%).

To reduce causality issues with respect to diversification, NF omit moves to newly founded establishments. We do this to reduce the mobility induced by firm growth in form of expansion. These excluded moves represent 22.32 percent of all moves with known destinations.

Of the 2,030,802 moves to existing establishments observed in 2009 to 2016, 80.0 percent are between 5-digit industries, and 57.2 percent are between industry sectors. These numbers are substantially higher than those reported by NF (23% change industries in the Swedish context).

To restrict the observed mobility to moves of employees with relevant human capital (e.g., employees with firm or industry specific knowledge), we follow Tate and Yang (TY) (2016) and exclude moves of employees who worked for less than two years in their former employer. This applies to 52.8 percent of all moves to existing establishments observed in the period 2009 to 2016 (1,072,593 of 2,030,802). Following NF, we exclude low-wage earners

---

continuously observed industries, 3 industries split up in 2013: the code 42.10.0 was further differentiated in 42.11.0, 42.12.0, and 42.13.0; 42.20.0 was split into 42.21.0 and 42.22.0; and 42.90.0 was split between 42.91.0 and 42.99.0. These industries are part of the construction sector. To avoid observing inter-industry mobility because of a change in industry categorization, we use the industry codes specified in 2012 (i.e., prior to splitting). Correcting for this by re-aggregating formerly joined industries, only 4 industries that employ an average of 250 employees or more per year are not observed in every year. These are: 01.16.0 Growing of fiber crops, 01.22.0 Growing of tropical and subtropical fruits, 11.04.0 Man. of other non-distilled fermented beverages, 24.34.0 Cold drawing of wire. The descriptions in the text and the measures are based on the 2012 classification.

<sup>2</sup> The following descriptive statistics are based on all employees that move to one of the 449 industries with at least 250 employees per year on average.

based on their characteristics in the year prior to the move. While NF use the median as the cut-off, we follow TY and use the 25<sup>th</sup> percentile which is a less restrictive cut-off enabled by our initial restrictions which exclude from the sample employees with weaker labor market ties such as secondary employment. Excluding employees with short tenure in the year prior to the move also should reduce the noise observed in the moves. Across industry-years, employees in the 25<sup>th</sup> percentile on average earn 179,455 DKK (or 26,000 USD) or less.<sup>3</sup> The correlation between these two restrictions (low-wage and short tenure) is .32 for the full sample and .36 for all movers. These restrictions reduce the number of moves observed from 2,030,802 to 762,232 (thus, 62.5% of moves are excluded).

The mobility among low-wage earners (20.8%) and employees with short tenure (20.5%) is significantly higher than among other types of employees ( $b = -.112$ ,  $t = -595.295$ ,  $p < .001$ ;  $b = -.128$ ,  $t = -782.720$ ,  $p < .001$ ; respectively); employees earning lower wages and on short tenure move more often to another sector than other employees (61.0% versus 51.8%,  $t = -1444.591$ ,  $p < .001$ ). Excluding these employees from the sample reduces the observed mobility to 7.64% (762,232 moves out of 9,982,184 observations).

NF argue also that managers are less likely to possess industry-specific skills and show that managers are more likely than other employees to change industry sectors. To account for the differences between managers and other employees, they exclude managers from the analysis.

Our sample (with the above restrictions) includes 517,184 manager-year observations (5.5% of the sample). Managers move about 0.3% less than other employees ( $t = 8.103$ ,  $p < .001$ ). These differences are smaller than those documented by NF; the number of managers

---

<sup>3</sup> Estimation includes employees with short tenure.

changing industry and/or industry sector is not substantially larger than the numbers of other employees (76.9% versus 75.7%, 50.0% versus 50.8%, respectively). In fact, the number of managers changing industry sectors is smaller than the numbers of other employees changing sectors ( $b = -.0077$ ,  $t = -2.9414$ ,  $p = .0033$ ).

One explanation for these differences between the Swedish and Danish data may stem from overall higher inter-industry mobility. Flexible labor contracts, which make hiring and firing easier in Denmark than in other European countries, may enable the observed inter-industry mobility.<sup>4</sup> Although we do not find substantial differences between managers and other employees, for consistency we exclude managers from the analysis.

We calculate flows from one industry to another in the years 2009-2016 for 198,025 potential industry combinations which results in 1,584,200—mostly zero—values.

To establish a baseline, we estimate the predicted mobility across industries, in line with NF who follow Neffke, Henning and Boschma (2011). To do this, we first calculate the number of employees and average salary in an industry in each year, and industry growth from the last year to the focal year measured as numbers of employees. We calculate number of employees and industry growth for the 445 industries observable in the years 2008-2016. Following NF, we pool the variables by summing them over eight years (2008-2015 and 2009-2016).

Our data include 445 origin industries and 444 destination industries during the period 2009 to 2016. The option for an employee to move within the same industry is omitted; the year

---

<sup>4</sup> The high overall inter-industry mobility seems not to be driven by location inside or outside the greater Copenhagen area where most businesses are located. While employees in the greater Copenhagen area are more likely to stay in the same industry if they move (20.69% versus 19.79%), they are equally likely to stay in the same industry sector ( $b = -0.00092$ ,  $p = .405$ ). If we exclude managers, this difference becomes insignificant (24.46% versus 24.27%,  $b = -0.00186$ ,  $p = .09997$ ), i.e., employees are equally likely to stay in the industry but are less likely to stay in the same industry sector (48.40% versus 49.54%,  $b = 0.0114$ ,  $p < .001$ ). However, these differences are small.

2008 is omitted because we observe no moves in that year. We can predict 198,025 (455 x 444) unique flows. Since most flows observed between industries valued zero, we follow NF and use a zero-inflated negative binominal model. The model is similar to the one used by NF, see Table C1. Table C1 Model 1 shows the results for employees including managers, and Model 2 shows the results excluding managers. Overall, the models are similar. The coefficients of origin and destination industry size are positive which is in line with NF. Growth of the origin has a negative coefficient while growth of the destination industry has a positive coefficient indicating movement from lower growth to higher growth industries. Labor flows are less likely to originate in high-wage industries, but high-wage industries receive higher cross-industry labor inflows.

The relatedness measure (SR) is calculated as the observed flow divided by the predicted flow—both pooled across years.

\*\*\* Table C1 about here \*\*\*

### **Descriptive statistics and transformation of the relatedness measure (SR)**

We calculated two different relatedness measures: one including managers (based on Model 1, SR) and one excluding managers (based on Model 2, SR<sub>2</sub>). We first present the results for SR.

*SR including managers.* Most values are zero; specifically, 64.85 percent of industry combinations have no labor flows—a smaller percentage than found by NF (81.3%). Also, only 25 percent of values are greater than 0.6, 10 percent are greater than 2.346, and 1 percent of values are greater than 15.335 (mean = 1.02, SD = 5.618). For the 69,606 industry combinations with non-zero value, the mean is 2.956 (SD = 9.164, median = 1.143). Following NF and Hartog and Neffke (2017), values of SR greater than 1 reflect industry relatedness. Around one in five

combinations (37,908, 19.186%) meet this criterion. Since SR is highly skewed, Hartog and Neffke (2017) propose mapping the measure on the interval [-1, 1]:

$$\widetilde{SR}_{ij} = \frac{SR_{ij} - 1}{SR_{ij} + 1}$$

Consequently, if  $\widetilde{SR}_{ij}$  is greater than 0 industries  $i$  and  $j$  are related. Compared to the asymmetric measure  $SR_{ij}$ , the number of related industries increases when we use the transformed measure  $SSR_{ij}$  (42,332, 21.425%).

Hartog and Neffke (2017) argue also that the measure should be symmetric. We therefore calculate the average relatedness of industry  $i$  to industry  $j$  and vice versa.

$$S\widetilde{SR}_{ij} = \frac{\widetilde{SR}_{ij} + \widetilde{SR}_{ji}}{2}$$

Using the symmetric, transformed measure  $S\widetilde{SR}_{ij}$ , fewer industries are considered related compared to when we use the asymmetric measure (23,450 versus 37,908 or 11.867% versus 19.186%), indicating that some industries have greater inflows than outflows (or vice versa) of employees from an industry. The symmetric non-transformed measure has the same number of related industries as the asymmetric measure.

To further explore how the transformed and non-transformed symmetric measures differ, we tabulate the number of NACE level 1 industries classified as related and their relatedness. Among the industries in the same industry sector, 68.04% (3,432 of 5,044) are related according to the SSR specification, and 51.88% according to the  $S\widetilde{SR}_{ij}$  specification. We assume a greater overlap between the labor flow-related measure and the NACE-based measure at least at the sector level. The correlation between the NACE-based measure and the mapped measure is higher than the correlation between the NACE-based and non-mapped measures ( $r = .200$ ,  $r = .184$ , respectively). Thus, while the overall percentage of related industries is lower using the

mapped measure (likely due to the smaller number of related industries), the correlation indicates that the mapped measure is closer to the in the literature most frequently used measures of industry relatedness based on NACE classifications.

*SR excluding managers.* For the *SR\_2* measure excluding managers, we observe a similar pattern. Most values are zero. The percentage of industry combinations with no reciprocal labor flows (63.62%) is as expected, slightly lower than when managers are included. Only 25 percent of values are greater than 0.633, 10 percent are greater than 2.364, and 1 percent of values are greater than 14.960 (mean = 1.03, SD = 5.353). For the 71,873 industry combinations with non-zero values, the mean is 2.841 (SD = 8.582, median = 1.117). Again, about one out of five combinations (38,571, 19.52%) have a value greater than 1, reflecting industry-relatedness. The transformation has no effect on the percentage of related industries. However, in the case of a symmetric transformed measure, the number of related industries decreases by 7 percent (12.30% versus 19.52%). This decrease is similar to the decrease observed for the measure including managers (see above). However, when managers are excluded, the non-transformed measure shows that the number of related industries is not independent of it being symmetric. The number of related industries increases if the measure is symmetric but not transformed (21.60% versus 19.52%).

The strong effect of making the measure symmetric after transformation suggests that some industries have very large mono-directional in- or outflows to/from a specific industry. This effect is amplified by managers' mobility.

Again, we tabulate the number of industries classified as related and sector relatedness at the NACE 1 sector level. Among the industries in the same industry sector, 69.07 percent (3,484

of 5,044) are related in the  $SSR_2$  specification and 53.37 percent are related in the  $\widetilde{SSR}_{2ij}$  specification. The correlation between the NACE-based measure and the symmetric mapped measure is higher than the correlation with the symmetric non-mapped measure ( $r = .202$ ,  $r = .187$ , respectively). These values are almost the same as the r-values of the measures including managers. Any non-symmetric measure (transformed or not) has a lower r-value (incl. managers  $r = .172$ , excl. managers  $r = .175$ ).

In the analysis, we use industry relatedness based on the measure excluding managers which is consistent with prior studies. Examples of industries deemed related, at the margin, and unrelated are shown in Table C2.

**Table C1: Zero-inflated negative binominal regression of labor flows**

|                                  | Model 1               | Model 2               |
|----------------------------------|-----------------------|-----------------------|
| <i>Count data equation</i>       |                       |                       |
| Growth(destination)              | 0.286<br>[11.11]      | 0.270<br>[10.69]      |
| Growth(origin)                   | -0.233<br>[-9.66]     | -0.225<br>[-9.51]     |
| Ln(employment(origin))           | 0.760<br>[157.86]     | 0.756<br>[159.89]     |
| Ln(employment(destin.))          | 0.833<br>[155.93]     | 0.828<br>[154.09]     |
| Ln(wage(origin))                 | -0.247<br>[-17.87]    | -0.193<br>[-14.13]    |
| Ln(wage(destination))            | 0.654<br>[45.16]      | 0.693<br>[48.38]      |
| Constant                         | -21.82<br>[-79.96]    | -23.02<br>[-85.09]    |
| <i>Regime selection equation</i> |                       |                       |
| Employment(origin)               | -0.000145<br>[-11.25] | -0.000154<br>[-10.86] |
| Employment(destination)          | -0.0000163<br>[-7.63] | -0.0000170<br>[-7.09] |
| Constant                         | 0.460<br>[7.10]       | 0.468<br>[7.09]       |
| <i>Overdispersion parameter</i>  |                       |                       |
| Ln(alpha)                        | 0.863<br>[133.30]     | 0.863<br>[136.49]     |
| Observations                     | 197,580               | 197,580               |
| Observations flow = 0            | 127,974               | 125,707               |

*t statistics in brackets*

*For industry i (origin), employment and wages are over the 2008-2015 period. For industry j (destination), employment and wages are over the 2009-2016 period. Growth is calculated over the entire period. Model 1 includes managers in the analysis, Model 2 excludes managers.*

**Table C2: Examples of Related and unrelated industries based on Flow-measure**

| <b>Industry A (in Manufacturing, ICT or KBS)</b>                              | <b>Industry B</b>                                                                                    | <b>SR_2</b> | <b>Same sector</b> |
|-------------------------------------------------------------------------------|------------------------------------------------------------------------------------------------------|-------------|--------------------|
| <i>Unrelated (no labor flows)</i>                                             |                                                                                                      |             |                    |
| 26.20 Man. of computers and peripheral equipment                              | 84.24 Public order and safety activities                                                             | -1          | no                 |
| 23.62 Man. of plaster products for construction purposes                      | 47.71 Retail sale of clothing in specialized stores                                                  | -1          | no                 |
| 16.22 Man. of assembled parquet floors                                        | 19.20 Man. of refined petroleum products                                                             | -1          | yes                |
| 32.99 Other manufacturing n.e.c.                                              | 11.07 Man. of soft drinks; prod.n of mineral waters & other bottled waters                           | -1          | yes                |
| 73.11 Advertising agencies                                                    | 77.40 Leasing of IP & similar products, except copyrighted works                                     | -1          | yes                |
| 63.12 Web portals                                                             | 28.12 Man. of fluid power equipment                                                                  | -1          | no                 |
| 22.19 Man. of other rubber products                                           | 10.84 Man. of condiments and seasonings                                                              | -1          | yes                |
| 60.10 Radio broadcasting                                                      | 28.11 Man. of engines & turbines, except aircraft, vehicle & cycle engines                           | -1          | no                 |
| 58.12 Publishing of directories and mailing lists                             | 47.24 Retail sale of bread, cakes, flour confectionery and sugar confectionery in specialized stores | -1          | no                 |
| 22.23 Man. of builders' ware of plastic                                       | 29.10 Man. of motor vehicles                                                                         | -1          | yes                |
| 63.99 Other information service activities n.e.c.                             | 01.41 Raising of dairy cattle                                                                        | -1          | no                 |
| 58.11 Book publishing                                                         | 55.20 Holiday and other short-stay accommodation                                                     | -1          | no                 |
| 23.32 Man. of bricks, tiles and construction products, in baked clay          | 20.59 Man. of other chemical products n.e.c.                                                         | -1          | yes                |
| 32.40 Man. of games and toys                                                  | 66.21 Risk and damage evaluation                                                                     | -1          | no                 |
| 25.30 Man. of steam generators, except central heating hot water boilers      | 47.25 Retail sale of beverages in specialized stores                                                 | -1          | no                 |
| 60.10 Radio broadcasting                                                      | 55.30 Recreational vehicle parks, trailer parks & camping grounds                                    | -1          | no                 |
| 17.12 Man. of paper and paperboard                                            | 58.11 Book publishing                                                                                | -1          | no                 |
| 58.12 Publishing of directories and mailing lists                             | 47.29 Other retail sale of food in specialized stores                                                | -1          | no                 |
| 18.11 Printing of newspapers                                                  | 01.62 Support activities for animal production                                                       | -1          | no                 |
| 13.93 Man. of carpets and rugs                                                | 65.30 Pension funding                                                                                | -1          | no                 |
| 23.13 Man. of hollow glass                                                    | 46.74 Wholesale of hardware, plumbing and heating equipment and supplies                             | -1          | no                 |
| 59.12 Motion picture, video and television program post-production activities | 79.11 Travel agency activities                                                                       | -1          | no                 |

*Unrelated (some labor flows)*

|                                                                 |                                                                     |            |    |
|-----------------------------------------------------------------|---------------------------------------------------------------------|------------|----|
| 71.12 Engineering activities and related technical consultancy  | 96.02 Hairdressing and other beauty treatment                       | -0.9666256 | no |
| 21.20 Man. of pharmaceutical preparations                       | 86.21 General medical practice activities                           | -0.9608127 | no |
| 28.99 Man. of other special-purpose machinery n.e.c.            | 87.10 Residential nursing care facilities                           | -0.9572899 | no |
| 26.30 Man. of communication equipment                           | 86.10 Hospital activities                                           | -0.9545004 | no |
| 62.01 Computer programming activities                           | 01.46 Raising of swine/pigs                                         | -0.9539816 | no |
| 21.10 Man. of basic pharmaceutical products                     | 88.91 Child day-care activities                                     | -0.9528102 | no |
| 72.19 Other research & experimental dev.t on nat. sc. & engin.g | 43.32 Joinery installation                                          | -0.9522729 | no |
| 62.03 Computer facilities management activities                 | 85.20 Primary education                                             | -0.9517642 | no |
| 23.99 Man. of other non-metallic mineral products n.e.c.        | 85.20 Primary education                                             | -0.9499358 | no |
| 28.93 Man. of machinery for food, beverage & tobacco processing | 86.10 Hospital activities                                           | -0.9469523 | no |
| 28.29 Man. of other general-purpose machinery n.e.c.            | 64.19 Other monetary intermediation                                 | -0.9460919 | no |
| 26.30 Man. of communication equipment                           | 85.20 Primary education                                             | -0.9455044 | no |
| 72.11 Research and experimental development on biotechnology    | 85.20 Primary education                                             | -0.9451958 | no |
| 32.40 Man. of games and toys                                    | 86.10 Hospital activities                                           | -0.9448817 | no |
| 62.03 Computer facilities management activities                 | 88.10 Social work activities without accom.n for elderly & disabled | -0.9446093 | no |
| 70.10 Activities of head offices                                | 96.02 Hairdressing and other beauty treatment                       | -0.9431314 | no |
| 62.02 Computer consultancy activities                           | 86.23 Dental practice activities                                    | -0.9425756 | no |
| 25.11 Man. of metal structures and parts of structures          | 86.90 Other human health activities                                 | -0.9423472 | no |
| 62.02 Computer consultancy activities                           | 25.62 Machining                                                     | -0.941782  | no |
| 25.62 Machining                                                 | 62.02 Computer consultancy activities                               | -0.941782  | no |
| 27.12 Man. of electricity distribution and control apparatus    | 85.20 Primary education                                             | -0.9407864 | no |
| 70.22 Business and other management consultancy activities      | 81.29 Other cleaning services                                       | -0.9403039 | no |

*Unrelated (<0)*

|                                                                            |                                                                            |            |    |
|----------------------------------------------------------------------------|----------------------------------------------------------------------------|------------|----|
| 26.40 Man. of consumer electronics                                         | 11.07 Man. of soft drinks; prod.n of mineral waters & other bottled waters | -0.1556089 | no |
| 11.07 Man. of soft drinks; prod.n of mineral waters & other bottled waters | 26.40 Man. of consumer electronics                                         | -0.1556089 | no |

|                                                                                              |                                                                       |            |     |
|----------------------------------------------------------------------------------------------|-----------------------------------------------------------------------|------------|-----|
| 20.11 Man. of industrial gases                                                               | 06.10 Extraction of crude petroleum                                   | -0.1556006 | no  |
| 14.12 Man. of workwear                                                                       | 46.38 Wholesale of other food, including fish, crustaceans & mollusks | -0.1555968 | no  |
| 16.29 Man. of other products of wood; Man. of articles of cork, straw and plaiting materials | 43.91 Roofing activities                                              | -0.1555593 | no  |
| 23.14 Man. of glass fibers                                                                   | 46.18 Agents specialized in the sale of other particular products     | -0.1554867 | no  |
| 33.20 Installation of industrial machinery and equipment                                     | 35.22 Distribution of gaseous fuels through mains                     | -0.1554461 | no  |
| 28.15 Man. of bearings, gears, gearing & driving elements                                    | 43.29 Other construction installation                                 | -0.155429  | no  |
| 10.89 Man. of other food products n.e.c.                                                     | 19.20 Man. of refined petroleum products                              | -0.155343  | yes |
| 19.20 Man. of refined petroleum products                                                     | 10.89 Man. of other food products n.e.c.                              | -0.155343  | yes |
| 22.21 Man. of plastic plates, sheets, tubes and profiles                                     | 22.23 Man. of builders' ware of plastic                               | -0.1553423 | yes |
| 22.23 Man. of builders' ware of plastic                                                      | 22.21 Man. of plastic plates, sheets, tubes and profiles              | -0.1553423 | yes |
| 18.11 Printing of newspapers                                                                 | 91.04 Botanical & zoological gardens & nature reserves activities     | -0.155303  | no  |
| 16.29 Man. of other products of wood; Man. of articles of cork, straw and plaiting materials | 46.45 Wholesale of perfume and cosmetics                              | -0.1552405 | no  |
| 10.51 Operation of dairies and cheese making                                                 | 94.11 Activities of business & employers membership organizations     | -0.1552025 | no  |
| 23.51 Man. of cement                                                                         | 20.59 Man. of other chemical products n.e.c.                          | -0.1551912 | yes |
| 20.59 Man. of other chemical products n.e.c.                                                 | 23.51 Man. of cement                                                  | -0.1551912 | yes |
| 27.11 Man. of electric motors, generators & transformers                                     | 27.32 Man. of other electronic & electric wires & cables              | -0.1551734 | yes |
| 27.32 Man. of other electronic & electric wires & cables                                     | 27.11 Man. of electric motors, generators and transformers            | -0.1551734 | yes |
| 22.19 Man. of other rubber products                                                          | 46.72 Wholesale of metals and metal ores                              | -0.1550985 | no  |
| 18.14 Binding and related services                                                           | 79.12 Tour operator activities                                        | -0.1550656 | no  |
| 27.51 Man. of electric domestic appliances                                                   | 25.99 Man. of other fabricated metal products n.e.c.                  | -0.1550007 | yes |

*Medium-level relatedness*

---

|                                                                                              |                                                                   |           |     |
|----------------------------------------------------------------------------------------------|-------------------------------------------------------------------|-----------|-----|
| 16.29 Man. of other products of wood; Man. of articles of cork, straw and plaiting materials | 53.20 Other postal and courier activities                         | 0.5483949 | no  |
| 75.00 Veterinary activities                                                                  | 91.04 Botanical & zoological gardens & nature reserves activities | 0.5484449 | no  |
| 28.30 Man. of agricultural and forestry machinery                                            | 01.47 Raising of poultry                                          | 0.5486473 | no  |
| 28.99 Man. of other special-purpose machinery n.e.c.                                         | 32.50 Man. of medical & dental instruments & supplies             | 0.5487545 | no  |
| 22.22 Man. of plastic packing goods                                                          | 28.25 Man. of non-domestic cooling and ventilation equipment      | 0.5489732 | yes |

|                                                              |                                                                                         |           |     |
|--------------------------------------------------------------|-----------------------------------------------------------------------------------------|-----------|-----|
| 25.92 Man. of light metal packaging                          | 95.29 Repair of other personal and household goods                                      | 0.5489738 | no  |
| 59.14 Motion picture projection activities                   | 90.01 Performing arts                                                                   | 0.5492676 | no  |
| 27.90 Man. of other electrical equipment                     | 77.32 Renting and leasing of construction and civil engineering machinery and equipment | 0.5493973 | no  |
| 22.22 Man. of plastic packing goods                          | 17.29 Man. of other articles of paper and paperboard                                    | 0.5495781 | yes |
| 10.92 Man. of prepared pet foods                             | 78.20 Temporary employment agency activities                                            | 0.5502093 | no  |
| 58.11 Book publishing                                        | 70.21 Public relation and communication activities                                      | 0.5502943 | no  |
| 28.92 Man. of machinery for mining, quarrying & construction | 27.11 Man. of electric motors, generators and transformers                              | 0.550391  | yes |
| 25.62 Machining                                              | 30.92 Man. of bicycles and invalid carriages                                            | 0.5503959 | yes |
| 20.14 Man. of other organic basic chemicals                  | 20.30 Man. of paints, varnishes & similar coatings, ink & mastics                       | 0.5507355 | yes |

*Highly related*

---

|                                                               |                                                                          |           |     |
|---------------------------------------------------------------|--------------------------------------------------------------------------|-----------|-----|
| 73.11 Advertising agencies                                    | 73.12 Media representation                                               | 0.9726303 | yes |
| 27.90 Man. of other electrical equipment                      | 26.12 Man. of loaded electronic boards                                   | 0.9745672 | yes |
| 23.62 Man. of plaster products for construction purposes      | 23.14 Man. of glass fibers                                               | 0.9759469 | yes |
| 60.20 Television programming and broadcasting activities      | 59.11 Motion picture, video and television program production activities | 0.9771681 | yes |
| 58.14 Publishing of journals and periodicals                  | 58.13 Publishing of newspapers                                           | 0.9778394 | yes |
| 58.19 Other publishing activities                             | 73.12 Media representation                                               | 0.9785253 | no  |
| 59.13 Motion picture, video & television program distribution | 59.11 Motion picture, video and television program production            | 0.9786387 | yes |
| 32.12 Manufacturing of jewelry and related articles           | 46.48 Wholesale of watches and jewelry                                   | 0.9805878 | no  |
| 32.12 Manufacturing of jewelry and related articles           | 47.77 Retail sale of watches and jewelry in specialized stores           | 0.9819761 | no  |
| 59.12 Motion picture, video & television program post-prod.n  | 59.11 Motion picture, video and television program production            | 0.9822665 | yes |
| 18.12 Other printing                                          | 18.14 Binding and related services                                       | 0.9832053 | yes |

---

*Note that industries in column A fall within the Manufacturing, ICT, or KBS sectors. The industries do, however, not need to be part of the sample investigated in the study to appear in the table.*

## APPENDIX D – EXAMPLES OF RELATED AND UNRELATED INDUSTRIES BASED ON THE EUCLIDEAN

### DISTANCE MEASURE

| Industry A (in Manufacturing, ICT or KBS)                        | Industry B                                                       | ED    | Same sector |
|------------------------------------------------------------------|------------------------------------------------------------------|-------|-------------|
| <i>Least related</i>                                             |                                                                  |       |             |
| 24.41 Precious metals production                                 | 20.51 Man. of explosives                                         | 1.247 | yes         |
| 20.51 Man. of explosives                                         | 01.16 Growing of fiber crops                                     | 1.247 | no          |
| 23.43 Man. of ceramic insulators and insulating fittings         | 24.41 Precious metals production                                 | 1.247 | yes         |
| 10.73 Man. of macaroni, noodles and similar farinaceous products | 08.91 Mining of chemical and fertilizer minerals                 | 1.267 | no          |
| 10.73 Man. of macaroni, noodles and similar farinaceous products | 01.22 Growing of tropical and subtropical fruits                 | 1.267 | no          |
| 10.73 Man. of macaroni, noodles and similar farinaceous products | 01.16 Growing of fiber crops                                     | 1.267 | no          |
| 24.41 Precious metals production                                 | 10.73 Man. of macaroni, noodles and similar farinaceous products | 1.267 | yes         |
| 24.41 Precious metals production                                 | 53.10 Postal activities under universal service obligation       | 1.281 | no          |
| 10.12 Processing and preserving of poultry meat                  | 08.91 Mining of chemical and fertilizer minerals                 | 1.285 | no          |
| 24.41 Precious metals production                                 | 10.12 Processing and preserving of poultry meat                  | 1.285 | yes         |
| 10.12 Processing and preserving of poultry meat                  | 01.22 Growing of tropical and subtropical fruits                 | 1.285 | no          |
| 10.12 Processing and preserving of poultry meat                  | 01.16 Growing of fiber crops                                     | 1.285 | no          |
| 24.41 Precious metals production                                 | 96.02 Hairdressing and other beauty treatment                    | 1.298 | no          |
| 24.41 Precious metals production                                 | 77.22 Renting of video tapes and disks                           | 1.318 | no          |
| 24.41 Precious metals production                                 | 08.91 Mining of chemical and fertilizer minerals                 | 1.414 | no          |
| 24.41 Precious metals production                                 | 01.22 Growing of tropical and subtropical fruits                 | 1.414 | no          |
| 24.41 Precious metals production                                 | 01.16 Growing of fiber crops                                     | 1.414 | no          |
| <i>Just unrelated (&gt; .298136)</i>                             |                                                                  |       |             |
| 32.30 Man. of sports goods                                       | 18.11 Printing of newspapers                                     | 0.298 | yes         |
| 21.20 Man. of pharmaceutical preparations                        | 03.22 Freshwater aquaculture                                     | 0.298 | no          |
| 10.81 Man. of sugar                                              | 46.52 Wholesale of electronic and telecom. equipment and parts   | 0.298 | no          |
| 30.99 Man. of other transport equipment n.e.c.                   | 28.25 Man. of non-domestic cooling and ventilation equipment     | 0.298 | yes         |

|                                                             |                                                                                |       |     |
|-------------------------------------------------------------|--------------------------------------------------------------------------------|-------|-----|
| 25.72 Man. of locks and hinges                              | 82.19 Photocopying, document prep. & other specialised office support          | 0.298 | no  |
| 20.59 Man. of other chemical products n.e.c.                | 46.13 Agents involved in the sale of timber and building materials             | 0.298 | no  |
| 26.11 Man. of electronic components                         | 28.94 Man. of machinery for textile, apparel and leather production            | 0.298 | yes |
| 13.96 Man. of other technical and industrial textiles       | 35.23 Trade of gas through mains                                               | 0.298 | no  |
| 10.71 Man. of bread; Man. of fresh pastry goods and cakes   | 47.91 Retail sale via mail order houses or via Internet                        | 0.298 | no  |
| 27.33 Man. of wiring devices                                | 77.40 Leasing of IP and similar products, except copyrighted works             | 0.298 | no  |
| 61.90 Other telecommunications activities                   | 25.50 Forging, pressing, stamping and roll-forming of metal; powder metallurgy | 0.298 | no  |
| 62.03 Computer facilities management activities             | 68.32 Management of real estate on a fee or contract basis                     | 0.298 | yes |
| 26.11 Man. of electronic components                         | 33.14 Repair of electrical equipment                                           | 0.298 | yes |
| 28.95 Man. of machinery for paper and paperboard production | 10.91 Man. of prepared feeds for farm animals                                  | 0.298 | yes |

*Just related (< .298136)*

---

|                                                                     |                                                                                 |       |     |
|---------------------------------------------------------------------|---------------------------------------------------------------------------------|-------|-----|
| 28.99 Man. of other special-purpose machinery n.e.c.                | 46.74 Wholesale of hardware, plumbing & heating equip.t & supplies              | 0.298 | no  |
| 28.41 Man. of metal forming machinery                               | 38.22 Treatment and disposal of hazardous waste                                 | 0.298 | no  |
| 28.13 Man. of other pumps and compressors                           | 46.62 Wholesale of machine tools                                                | 0.298 | no  |
| 33.19 Repair of other equipment                                     | 01.49 Raising of other animals                                                  | 0.298 | no  |
| 72.11 Research and experimental development on biotechnology        | 46.77 Wholesale of waste and scrap                                              | 0.298 | no  |
| 21.20 Man. of pharmaceutical preparations                           | 77.32 Renting & leasing of construction & civil engineering machinery & equip.t | 0.298 | no  |
| 72.19 Other research and experimental dev.t on natural sc. & engin. | 24.20 Man. of tubes, pipes, hollow profiles and related fittings, of steel      | 0.298 | no  |
| 26.20 Man. of computers and peripheral equipment                    | 47.79 Retail sale of second-hand goods in stores                                | 0.298 | no  |
| 20.42 Man. of perfumes and toilet preparations                      | 46.36 Wholesale of sugar and chocolate and sugar confectionery                  | 0.298 | no  |
| 17.29 Man. of other articles of paper and paperboard                | 46.21 Wholesale of grain, unmanufactured tobacco, seeds & animal feeds          | 0.298 | no  |
| 10.81 Man. of sugar                                                 | 82.11 Combined office administrative service activities                         | 0.298 | no  |
| 58.19 Other publishing activities                                   | 10.82 Man. of cocoa, chocolate and sugar confectionery                          | 0.298 | no  |
| 58.29 Other software publishing                                     | 96.04 Physical well-being activities                                            | 0.298 | no  |
| 16.23 Man. of other builder carpentry and joinery                   | 95.24 Repair of furniture and home furnishings                                  | 0.298 | no  |
| 26.30 Man. of communication equipment                               | 46.45 Wholesale of perfume and cosmetics                                        | 0.298 | no  |
| 32.13 Man. of imitation jewelry and related articles                | 30.11 Building of ships and floating structures                                 | 0.298 | yes |

|                                                                    |                                                               |       |    |
|--------------------------------------------------------------------|---------------------------------------------------------------|-------|----|
| 20.41 Man. of soap & detergents, cleaning & polishing preparations | 95.29 Repair of other personal and household goods            | 0.298 | no |
| 63.12 Web portals                                                  | 10.39 Other processing and preserving of fruit and vegetables | 0.298 | no |

*Average (among related industries)*

|                                                                      |                                                                                   |       |     |
|----------------------------------------------------------------------|-----------------------------------------------------------------------------------|-------|-----|
| 20.41 Man. of soap and detergents, cleaning & polishing preparations | 32.99 Other manufacturing n.e.c.                                                  | 0.148 | yes |
| 59.20 Sound recording and music publishing activities                | 46.19 Agents involved in the sale of a variety of goods                           | 0.148 | yes |
| 63.99 Other information service activities n.e.c.                    | 94.99 Activities of other membership organizations n.e.c.                         | 0.148 | yes |
| 70.22 Business and other management consultancy activities           | 82.11 Combined office administrative service activities                           | 0.148 | yes |
| 28.22 Man. of lifting and handling equipment                         | 28.30 Man. of agricultural and forestry machinery                                 | 0.149 | yes |
| 24.53 Casting of light metals                                        | 24.51 Casting of iron                                                             | 0.149 | yes |
| 32.99 Other manufacturing n.e.c.                                     | 23.14 Man. of glass fibers                                                        | 0.149 | yes |
| 59.20 Sound recording and music publishing activities                | 77.39 Renting * leasing of other machinery, equipment and tangible goods n.e.c.   | 0.149 | yes |
| 70.10 Activities of head offices                                     | 62.09 Other information technology and computer service activities                | 0.149 | yes |
| 28.92 Man. of machinery for mining, quarrying and construction       | 28.41 Man. of metal forming machinery                                             | 0.149 | yes |
| 14.19 Man. of other wearing apparel and accessories                  | 46.12 Agents involved in the sale of fuels, ores, metals and industrial chemicals | 0.149 | no  |
| 14.19 Man. of other wearing apparel and accessories                  | 46.44 Wholesale of china and glassware and cleaning materials                     | 0.149 | no  |
| 17.12 Man. of paper and paperboard                                   | 17.22 Man. of household and sanitary goods and of toilet requisites               | 0.150 | yes |

*Most related*

|                                                                            |                                                                              |       |     |
|----------------------------------------------------------------------------|------------------------------------------------------------------------------|-------|-----|
| 28.93 Man. of machinery for food, beverage and tobacco processing          | 28.92 Man. of machinery for mining, quarrying and construction               | 0.084 | yes |
| 28.92 Man. of machinery for mining, quarrying and construction             | 28.22 Man. of lifting and handling equipment                                 | 0.086 | yes |
| 11.07 Man. of soft drinks; prod.n of mineral waters & other bottled waters | 10.84 Man. of condiments and seasonings                                      | 0.087 | yes |
| 10.84 Man. of condiments and seasonings                                    | 11.07 Man. of soft drinks; prod.n of mineral waters and other bottled waters | 0.087 | yes |
| 28.99 Man. of other special-purpose machinery n.e.c.                       | 28.92 Man. of machinery for mining, quarrying and construction               | 0.090 | yes |
| 28.22 Man. of lifting and handling equipment                               | 28.93 Man. of machinery for food, beverage and tobacco processing            | 0.090 | yes |
| 28.29 Man. of other general-purpose machinery n.e.c.                       | 28.93 Man. of machinery for food, beverage and tobacco processing            | 0.094 | yes |
| 70.10 Activities of head offices                                           | 36.00 Water collection, treatment and supply                                 | 0.100 | no  |
| 22.29 Man. of other plastic products                                       | 22.22 Man. of plastic packing goods                                          | 0.101 | yes |

|                                                                         |                                                           |       |     |
|-------------------------------------------------------------------------|-----------------------------------------------------------|-------|-----|
| 26.51 Man. of instr.ts & appliances for measuring, testing & navigation | 27.90 Man. of other electrical equipment                  | 0.105 | yes |
| 25.92 Man. of light metal packaging                                     | 24.53 Casting of light metals                             | 0.110 | yes |
| 70.22 Business and other management consultancy activities              | 94.99 Activities of other membership organizations n.e.c. | 0.111 | yes |

*Note that industries in column A fall within the Manufacturing, ICT, or KBS sectors. The industries do, however, not need to be part of the sample investigated in the study to appear in the table.*

**APPENDIX E – RESULTS USING 4-YEAR AND 10-YEAR BASED MEASURES  
OF INDUSTRY EXPERIENCE**

**Table E1: Origin of employees in new ventures (4-year definition)**

**Panel A: ED-measure**

| Worker type | From same industry | From related industry | From unrelated industry | From other | Total |
|-------------|--------------------|-----------------------|-------------------------|------------|-------|
| Focal       | 19.75%             | 40.92%                | 34.39%                  | 4.94%      | 100%  |
| Other       | 14.05%             | 22.52%                | 43.04%                  | 20.39%     | 100%  |
| Total       | 15.55%             | 27.35%                | 40.77%                  | 16.34%     | 100%  |

**Panel B: Flow-measure**

| Worker type | From same industry | From related industry | From unrelated industry | From other | Total |
|-------------|--------------------|-----------------------|-------------------------|------------|-------|
| Focal       | 19.75%             | 54.50%                | 20.11%                  | 5.64%      | 100%  |
| Other       | 14.05%             | 37.95%                | 26.22%                  | 21.77%     | 100%  |
| Total       | 15.55%             | 42.30%                | 24.62%                  | 17.54%     | 100%  |

**Panel C: Sector measure**

| Worker type | From same industry | From same sector, but different industry | From different sector | From other | Total |
|-------------|--------------------|------------------------------------------|-----------------------|------------|-------|
| Focal       | 19.75%             | 25.40%                                   | 49.91%                | 4.94%      | 100%  |
| Other       | 14.05%             | 13.80%                                   | 51.76%                | 20.39%     | 100%  |
| Total       | 15.55%             | 16.84%                                   | 51.27%                | 16.34%     | 100%  |

**Table E2: Origin of employees in new ventures (10-year definition)**

**Panel A: ED measure**

| Worker type | From same industry | From related industry | From unrelated industry | From other | Total |
|-------------|--------------------|-----------------------|-------------------------|------------|-------|
| Focal       | 23.46%             | 46.74%                | 26.28%                  | 3.53%      | 100%  |
| Other       | 15.68%             | 26.47%                | 39.27%                  | 18.57%     | 100%  |
| Total       | 17.72%             | 31.79%                | 35.86%                  | 14.62%     | 100%  |

**Panel B: Flow measure**

| Worker type | From same industry | From related industry | From unrelated industry | From other | Total |
|-------------|--------------------|-----------------------|-------------------------|------------|-------|
| Focal       | 23.46%             | 58.20%                | 14.11%                  | 4.23%      | 100%  |
| Other       | 15.68%             | 42.22%                | 21.96%                  | 20.14%     | 100%  |
| Total       | 17.72%             | 46.41%                | 19.90%                  | 15.96%     | 100%  |

**Panel C: Sector measure**

| Worker type | From same industry | From same sector, but different industry | From different sector | From other | Total |
|-------------|--------------------|------------------------------------------|-----------------------|------------|-------|
| Focal       | 23.46%             | 29.98%                                   | 43.03%                | 3.53%      | 100%  |
| Other       | 15.68%             | 15.75%                                   | 50.00%                | 18.57%     | 100%  |
| Total       | 17.72%             | 19.48%                                   | 48.17%                | 14.62%     | 100%  |

**Table E3: New venture industry experience**

| Industry Experience                                                                              | 1-year | 4-year | 10-year |
|--------------------------------------------------------------------------------------------------|--------|--------|---------|
| At least one focal employee with IE in t0                                                        | 15.86% | 22.01% | 25.57%  |
| At least one employee with IE, but no focal employee with IE                                     | 19.09% | 23.30% | 23.95%  |
| ED: At least one focal employee with related IE, but no focal employee from the same industry    | 29.45% | 30.74% | 29.77%  |
| FLOW: At least one focal employee with related IE, but no focal employee from the same industry  | 39.48% | 39.48% | 37.22%  |
| SECT: At least one focal employee from same sector, but no focal employee from the same industry | 21.36% | 22.33% | 22.65%  |
| At least TWO focal employee with IE                                                              | 5.18%  | 8.09%  | 9.06%   |
| At least TWO focal employee with IE (among those with IE, n = 49)                                | 32.65% | 46.94% | 48.98%  |

*n = 309 new ventures unless specified differently*

**Table E4: Venture survival within the first three years (4-year based definition)**

| Mobility in the first 3 years                                                             | Model 1              | Model 2              | Model 3              | Model 4              | Model 5              | Model 6            |
|-------------------------------------------------------------------------------------------|----------------------|----------------------|----------------------|----------------------|----------------------|--------------------|
| At least one focal empl. with IE                                                          | 0.083                | 0.095                | 0.092                | 0.104                | 0.091                | .                  |
| .                                                                                         | [1.27]               | [1.39]               | [1.34]               | [1.49]               | [1.34]               | .                  |
| At least one other empl. with IE<br>but not a focal empl. with IE                         | .                    | 0.043                | .                    | .                    | .                    | .                  |
| .                                                                                         | .                    | [0.62]               | .                    | .                    | .                    | .                  |
| ED: At least one focal<br>employee with related IE (but<br>none from same industry)       | .                    | .                    | 0.045                | .                    | .                    | .                  |
| .                                                                                         | .                    | .                    | [0.71]               | .                    | .                    | .                  |
| FLOW: At least one focal<br>employee with related IE (but<br>none from same industry)     | .                    | .                    | .                    | 0.069                | .                    | .                  |
| .                                                                                         | .                    | .                    | .                    | [1.15]               | .                    | .                  |
| SECTOR: At least one focal<br>employee with related IE (but<br>none from same industry)   | .                    | .                    | .                    | .                    | 0.062                | .                  |
| .                                                                                         | .                    | .                    | .                    | .                    | [0.92]               | .                  |
| At least <b>two</b> focal empl. with IE                                                   | .                    | .                    | .                    | .                    | .                    | 0.220 <sup>+</sup> |
| .                                                                                         | .                    | .                    | .                    | .                    | .                    | [1.71]             |
| Nr. employees (ln)                                                                        | -0.11                | -0.116 <sup>+</sup>  | -0.106               | -0.113               | -0.108               | 0.063              |
| .                                                                                         | [-1.59]              | [-1.69]              | [-1.51]              | [-1.62]              | [-1.55]              | [0.41]             |
| Rural area                                                                                | -0.002               | -0.007               | 0.004                | 0.005                | 0.001                | 0.034              |
| .                                                                                         | [-0.04]              | [-0.12]              | [0.06]               | [0.09]               | [0.01]               | [0.20]             |
| Establishment year dummies                                                                | YES                  | YES                  | YES                  | YES                  | YES                  | YES                |
| Constant                                                                                  | 0.703 <sup>***</sup> | 0.703 <sup>***</sup> | 0.680 <sup>***</sup> | 0.676 <sup>***</sup> | 0.686 <sup>***</sup> | 0.606 <sup>*</sup> |
| .                                                                                         | [4.06]               | [4.05]               | [3.82]               | [3.79]               | [3.88]               | [2.14]             |
| R-squared                                                                                 | 0.074                | 0.075                | 0.075                | 0.078                | 0.076                | 0.197              |
| F                                                                                         | 3.408                | 3.097                | 3.148                | 3.43                 | 3.226                | 1.668              |
| Log likelihood                                                                            | -205.427             | -205.224             | -205.158             | -204.72              | -205                 | -22.813            |
| Sample                                                                                    | V                    | V                    | V                    | V                    | V                    | V with IE          |
| No. of observations                                                                       | 309                  | 309                  | 309                  | 309                  | 309                  | 49                 |
| <i>t</i> statistics in brackets                                                           | .                    | .                    | .                    | .                    | .                    | .                  |
| <sup>+</sup> <i>p</i> < 0.10, * <i>p</i> < 0.05, ** <i>p</i> < 0.01, *** <i>p</i> < 0.001 |                      |                      |                      |                      |                      |                    |

**Table E5: Venture survival within the first three years (10-year based definition)**

| Mobility in the first 3 years                                                           | Model 1  | Model 2  | Model 3  | Model 4  | Model 5  | Model 6   |
|-----------------------------------------------------------------------------------------|----------|----------|----------|----------|----------|-----------|
| At least one focal empl. with IE                                                        | 0.080    | 0.084    | 0.083    | 0.090    | 0.082    | .         |
| .                                                                                       | [1.30]   | [1.28]   | [1.32]   | [1.41]   | [1.32]   | .         |
| At least one other empl. with IE<br>but not a focal empl. with IE                       | .        | 0.011    | .        | .        | .        | .         |
| .                                                                                       | .        | [0.16]   | .        | .        | .        | .         |
| ED: At least one focal<br>employee with related IE (but<br>none from same industry)     | .        | .        | 0.035    | .        | .        | .         |
| .                                                                                       | .        | .        | [0.57]   | .        | .        | .         |
| FLOW: At least one focal<br>employee with related IE (but<br>none from same industry)   | .        | .        | .        | 0.058    | .        | .         |
| .                                                                                       | .        | .        | .        | [1.00]   | .        | .         |
| SECTOR: At least one focal<br>employee with related IE (but<br>none from same industry) | .        | .        | .        | .        | 0.053    | .         |
| .                                                                                       | .        | .        | .        | .        | [0.81]   | .         |
| At least <b>two</b> focal empl. with IE                                                 | .        | .        | .        | .        | .        | 0.175     |
| .                                                                                       | .        | .        | .        | .        | .        | [1.35]    |
| Nr. employees (ln)                                                                      | -0.11    | -0.111   | -0.106   | -0.112   | -0.108   | 0.075     |
| .                                                                                       | [-1.59]  | [-1.60]  | [-1.52]  | [-1.60]  | [-1.54]  | [0.50]    |
| Rural area                                                                              | -0.002   | -0.003   | 0.002    | 0.003    | 0.000    | 0.05      |
| .                                                                                       | [-0.03]  | [-0.05]  | [0.03]   | [0.05]   | [-0.00]  | [0.29]    |
| Establishment year dummies                                                              | YES      | YES      | YES      | YES      | YES      | YES       |
| Constant                                                                                | 0.703*** | 0.703*** | 0.687*** | 0.683*** | 0.690*** | 0.606*    |
| .                                                                                       | [4.07]   | [4.06]   | [3.90]   | [3.87]   | [3.93]   | [2.20]    |
| R-squared                                                                               | 0.074    | 0.074    | 0.075    | 0.077    | 0.076    | 0.174     |
| F                                                                                       | 3.441    | 3.086    | 3.157    | 3.39     | 3.233    | 1.608     |
| Log likelihood                                                                          | -205.381 | -205.368 | -205.214 | -204.858 | -205.059 | -23.504   |
| Sample                                                                                  | V        | V        | V        | V        | V        | V with IE |
| No. of observations                                                                     | 309      | 309      | 309      | 309      | 309      | 49        |
| <i>t</i> statistics in brackets                                                         | .        | .        | .        | .        | .        | .         |
| + $p < 0.10$ , * $p < 0.05$ , ** $p < 0.01$ , *** $p < 0.001$                           | .        | .        | .        | .        | .        | .         |

**Table E6: Industry experience in new subsidiaries**

| At least one focal employee<br>from same industry | New<br>subsidiaries | New<br>ventures |
|---------------------------------------------------|---------------------|-----------------|
| 1-year                                            | 23.60%              | 15.86%          |
| 4-year                                            | 27.81%              | 22.01%          |
| 10-year                                           | 29.78%              | 25.57%          |
| <i>Observations (n)</i>                           | 356                 | 309             |
